# Supplementary material for: Association of Heavy Alcohol Intake and ALDH2 rs671 Polymorphism With Hepatocellular Carcinoma and Mortality in Patients With Hepatitis B Virus–Related Cirrhosis
Source: PubMed Central journal article supplement (PMC9315423; doi:10.1001/jamanetworkopen.2022.23511), 2022-07-25

## Supplemental Online Content

Tsai MC, Yang SS, Lin CC, et al. Association of heavy alcohol intake and *ALDH2* rs671 polymorphism with hepatocellular carcinoma and mortality in patients with hepatitis B virus–related cirrhosis. *JAMA Netw Open*. 2022;5(7):e2223511. doi:10.1001/jamanetworkopen.2022.23511

**eAppendix 1.** Supplemental Materials and Methods

**eAppendix 2.** Supplemental Results

**eTable 1.** Demographic Data Between Concomitant HBV Infection and Heavy Alcoholism and HBV Infection Alone After Propensity Score Matching

**eTable 2.** Demographic Data Between Concomitant HBV Infection and Heavy Alcoholism and Alcoholism Alone After Propensity Score Matching

**eTable 3.** Demographic Data Between HBV Infection Alone and Heavy Alcoholism Alone After Propensity Score Matching

**eFigure 1.** Study Flowchart for the Inclusion of Participants

**eFigure 2.** The Cumulative Incidences of HCC and Mortality After Propensity Score Matching

**eFigure 3.** The Cumulative Incidences of HCC With Competing Risk Analysis

**eFigure 4.** The Cumulative Incidences of HCC and Mortality in Compensated Cirrhotic Patients

This supplemental material has been provided by the authors to give readers additional information about their work.

## **eAppendix 1. Supplemental Materials and Methods**

### **HBV marker assay**

All HBV patients were tested for HBsAg, hepatitis B e antigen (HBeAg) and anti-HBe antibody, as well as serum HBV DNA with a lower detection limit of 15 IU/mL.

### **Treatments**

Alcoholic patients were encouraged to abstain from alcohol. Abstinence was defined as abstaining from alcohol for more than 6 months during follow-up. Antiviral NUC therapy was administered if patients had one of serum HBV DNA  $\geq 2000$  IU/mL, total bilirubin  $\geq 2$  mg/dl, or prolonged prothrombin time  $>3$  seconds in HBV-related cirrhotic patients according to National Health Insurance in Taiwan. Nine hundred and seventy-five patients received antiviral therapy and the mean time of antiviral therapy was 4.0 years. HCC treatments included surgical resection, radiofrequency ablation, transarterial chemoembolization, targeted therapy, immunotherapy, hepatic artery infusion chemotherapy, radiotherapy, and best supportive care.

## **eAppendix 2. Supplemental Results**

### **Newly developed HCC and mortality in cirrhotic patients with Child-Pugh class A**

Of the patients with compensated cirrhosis, 38 (22.1%) patients with concomitant HBV infection and alcoholism, 41 (12.9%) patients with HBV infection alone, and 12 (7.7%) patients with alcoholism alone were found to have newly developed HCC during follow-up. The 1-, 3-, 5-, and 10-year cumulative incidence rates of HCC were 6.5%, 17.3%, 21.1%, and 35.9%, respectively, for patients with concomitant HBV infection and alcoholism; 2.6%, 9.4%, 11%, and 22.8% for patients with HBV infection alone; and 0%, 3.8%, 3.8%, and 14.7% for patients with alcoholism alone (eFigure 4A). In Child-Pugh class A patients, the 10-year cumulative incidence rates of HCC were higher in patients with concomitant HBV infection and alcoholism than in those with HBV infection alone (HR= 2.58; 95% CI: 1.66-4.01,  $P<.001$ ) or with alcoholism alone (HR= 4.12; 95% CI: 2.15-7.91,  $P<.001$ ). For cirrhotic patients with Child-Pugh classes B and C, the cumulative incidence of HCC did not show significant differences.

Regarding mortality, 47 (27.3%) patients with concomitant HBV infection and alcoholism, 91 (28.7%) patients with HBV infection alone, and 36 (29.7%) patients with alcoholism alone experienced mortality during follow-up. The 1-, 3-, 5-, and 10-year cumulative incidence rates of mortality were 2.4%, 22.7%, 26.4%, and 47.3%, respectively, for patients with concomitant HBV infection and alcoholism; 1.9%, 12.9%, 27.2%, and 36.3% for patients with HBV infection alone; and 1.8%, 3.7%, 14.4%, and 45.1% for patients with alcoholism alone (eFigure 4B). The mortality rate was not significantly different among the three groups of Child-Pugh classes A, B, and C.

**Table 1. Demographic Data Between Concomitant HBV Infection and Heavy Alcoholism and HBV Infection Alone After Propensity Score Matching**

| Characteristics                                         | HBV+alcoholism<br>(n =266) | HBV<br>(n =796) | SMD  | P value |
|---------------------------------------------------------|----------------------------|-----------------|------|---------|
| Age, mean (SD), y                                       | 49.8 (10.1)                | 50.5 (10.4)     | 0.16 | 0.39    |
| Gender, male                                            | 220 (82.7)                 | 647 (81.3)      | 0.07 | 0.68    |
| BMI (kg/m <sup>2</sup> )                                | 24.1 (3.5)                 | 23.7 (3.4)      | 0.09 | 0.53    |
| Alcohol intake, mean (SD), g/day                        | 182 (80)                   | 0 (0)           |      | <.001   |
| Alcohol duration, mean (SD), y                          | 17.9 (6.9)                 | 0 (0)           |      | <.001   |
| Abstinence                                              | 139 (52.6)                 | NA              |      | NA      |
| AST, mean (SD), U/L                                     | 138 (149)                  | 152 (121)       |      | 0.07    |
| ALT, mean (SD), U/L                                     | 62 (50)                    | 64 (58)         |      | 0.76    |
| Total bilirubin, mean (SD), mg/dL                       | 3.4 (3.3)                  | 4.0 (5.6)       |      | 0.11    |
| Alk-P, mean (SD), IU/L                                  | 351 (226)                  | 322 (180)       |      | 0.06    |
| γ-GT, mean (SD), IU/L                                   | 319 (306)                  | 331 (303)       |      | 0.25    |
| Albumin, mean (SD), g/dL                                | 3.3 (0.6)                  | 3.3 (0.6)       |      | 0.97    |
| Platelet count, mean (SD), x10 <sup>3</sup> /mL         | 106 (75)                   | 120 (106)       |      | 0.13    |
| INR, mean (SD)                                          | 1.3 (0.5)                  | 1.3 (0.3)       |      | 0.78    |
| α-fetoprotein, mean (SD), ng/mL                         | 36 (111)                   | 27 (95)         |      | 0.08    |
| HBsAg-positive                                          | 266 (100)                  | 796 (100)       |      | 0.99    |
| HBeAg-positive                                          | 89 (33.4)                  | 270 (33.9)      |      | 0.88    |
| Baseline HBV DNA, mean (SD),<br>log <sub>10</sub> IU/mL | 4.3 (2.2)                  | 4.2 (2.3)       |      | 0.93    |
| Baseline HBV DNA, ≥5 log <sub>10</sub> IU/mL            | 111 (41.7)                 | 313 (39.3)      |      | 0.41    |
| Antiviral viral therapy -positive                       | 228 (85.7)                 | 667 (83.8)      |      | 0.15    |
| Child-Pugh class                                        |                            |                 |      |         |
| A                                                       | 111 (41.7)                 | 317 (39.8)      | 0.18 | 0.27    |
| B                                                       | 84 (31.6)                  | 316 (39.7)      |      |         |
| C                                                       | 71 (26.7)                  | 163 (20.5)      |      |         |

Data shown as number (%) or mean (SD); SMD: Standardized mean difference; BMI: Body mass index; AST: Aspartate aminotransferase; ALT: Alanine aminotransferase; Alk-P: Alkaline phosphatase; γ-GT: γ-glutamyltransferase; INR: international normalized ratio; HBsAg: Hepatitis B Surface Antigen; HBeAg: Hepatitis B e Antigen; HBV: Hepatitis B Virus; NA: data not available;

**Table 2. Demographic Data Between Concomitant HBV Infection and Heavy Alcoholism and Alcoholism Alone After Propensity Score Matching**

| Characteristics                                         | HBV+alcoholism<br>(n =280) | Alcoholism<br>(n =280) | SMD  | P value |
|---------------------------------------------------------|----------------------------|------------------------|------|---------|
| Age, mean (SD), y                                       | 49.7 (9.9)                 | 50.1 (10.1)            | 0.06 | 0.71    |
| Gender, male                                            | 238 (85.0)                 | 235 (83.9)             | 0.03 | 0.83    |
| BMI (kg/m <sup>2</sup> )                                | 24.2 (3.8)                 | 23.9 (3.9)             | 0.07 | 0.66    |
| Alcohol intake, mean (SD), g/day                        | 186 (81)                   | 178 (91)               |      | 0.51    |
| Alcohol duration, mean (SD), y                          | 18.1 (6.3)                 | 17.9 (6.6)             |      | 0.87    |
| Abstinence                                              | 148 (52.9)                 | 163 (58.2)             |      | 0.18    |
| AST, mean (SD), U/L                                     | 136 (139)                  | 147 (125)              |      | 0.07    |
| ALT, mean (SD), U/L                                     | 64 (51)                    | 60 (51)                |      | 0.42    |
| Total bilirubin, mean (SD), mg/dL                       | 3.1 (3.3)                  | 3.7 (5.4)              |      | 0.08    |
| Alk-P, mean (SD), IU/L                                  | 378 (215)                  | 370 (202)              |      | 0.61    |
| γ-GT, mean (SD), IU/L                                   | 308 (296)                  | 337 (285)              |      | 0.17    |
| Albumin, mean (SD), g/dL                                | 3.2 (0.6)                  | 3.2 (0.7)              |      | 0.95    |
| Platelet count, mean (SD), x10 <sup>3</sup> /mL         | 103 (92)                   | 111 (115)              |      | 0.07    |
| INR, mean (SD)                                          | 1.3 (0.4)                  | 1.3 (0.3)              |      | 0.68    |
| α-fetoprotein, mean (SD), ng/mL                         | 38 (113)                   | 27 (101)               |      | 0.17    |
| HBsAg-positive                                          | 280 (100)                  | 0 (0)                  |      | <.001   |
| HBeAg-positive                                          | 76 (27.1)                  | NA                     |      | NA      |
| Baseline HBV DNA, mean (SD),<br>log <sub>10</sub> IU/mL | 4.4 (2.1)                  | NA                     |      | NA      |
| Baseline HBV DNA, ≥5 log <sub>10</sub> IU/mL            | 118 (42.1)                 | NA                     |      | NA      |
| Antiviral viral therapy -positive                       | 258 (92.1)                 | NA                     |      | NA      |
| Child-Pugh class                                        |                            |                        |      |         |
| A                                                       | 133 (47.5)                 | 127 (45.7)             | 0.09 | 0.57    |
| B                                                       | 74 (26.4)                  | 78 (27.6)              |      |         |
| C                                                       | 73 (26.1)                  | 75 (26.7)              |      |         |

Data shown as number (%) or mean (SD); SMD: Standardized mean difference; BMI: Body mass index; AST: Aspartate aminotransferase; ALT: Alanine aminotransferase; Alk-P: Alkaline phosphatase; γ-GT: γ-glutamyltransferase; INR: international normalized ratio; HBsAg: Hepatitis B Surface Antigen; HBeAg: Hepatitis B e Antigen; HBV: Hepatitis B Virus; NA: data not available;

**eTable 3. Demographic Data Between HBV Infection Alone and Heavy Alcoholism Alone After Propensity Score Matching**

| Characteristics                                      | Alcoholism<br>(n =266) | HBV<br>(n =796) | SMD  | P value |
|------------------------------------------------------|------------------------|-----------------|------|---------|
| Age, mean (SD), y                                    | 50.7 (10.1)            | 50.5 (10.4)     | 0.01 | 0.92    |
| Gender, male                                         | 218 (81.9)             | 647 (81.3)      | 0.03 | 0.81    |
| BMI (kg/m <sup>2</sup> )                             | 23.8 (3.6)             | 23.7 (3.4)      | 0.04 | 0.79    |
| Alcohol intake, mean (SD), g/day                     | 177 (93)               | 0 (0)           |      | <.001   |
| Alcohol duration, mean (SD), y                       | 17.3 (6.2)             | 0 (0)           |      | <.001   |
| Abstinence                                           | 163 (61.3)             | NA              |      | NA      |
| AST, mean (SD), U/L                                  | 145 (116)              | 152 (121)       |      | 0.46    |
| ALT, mean (SD), U/L                                  | 59 (50)                | 64 (58)         |      | 0.59    |
| Total bilirubin, mean (SD), mg/dL                    | 3.8 (5.5)              | 4.0 (5.6)       |      | 0.77    |
| Alk-P, mean (SD), IU/L                               | 362 (209)              | 322 (180)       |      | 0.06    |
| γ-GT, mean (SD), IU/L                                | 343 (257)              | 331 (303)       |      | 0.29    |
| Albumin, mean (SD), g/dL                             | 3.6 (0.6)              | 3.3 (0.6)       |      | 0.96    |
| Platelet count, mean (SD), x10 <sup>3</sup> /mL      | 112 (110)              | 120 (106)       |      | 0.23    |
| INR, mean (SD)                                       | 1.3 (0.3)              | 1.3 (0.3)       |      | 0.68    |
| α-fetoprotein, mean (SD), ng/mL                      | 22 (69)                | 27 (95)         |      | 0.27    |
| HBsAg-positive                                       | 0 (0)                  | 796 (100)       |      | <.001   |
| HBeAg-positive                                       | NA                     | 270 (33.9)      |      | NA      |
| Baseline HBV DNA, mean (SD), log <sub>10</sub> IU/mL | NA                     | 4.2 (2.3)       |      | NA      |
| Baseline HBV DNA, ≥5 log <sub>10</sub> IU/mL         | NA                     | 313 (39.3)      |      | NA      |
| Antiviral viral therapy -positive                    | NA                     | 667 (83.8)      |      | NA      |
| Child-Pugh class                                     |                        |                 |      |         |
| A                                                    | 110 (41.3)             | 317 (39.8)      | 0.11 | 0.65    |
| B                                                    | 106 (39.9)             | 316 (39.7)      |      |         |
| C                                                    | 50 (18.8)              | 163 (20.5)      |      |         |

Data shown as number (%) or mean (SD); SMD: Standardized mean difference; BMI: Body mass index;

AST: Aspartate aminotransferase; ALT: Alanine aminotransferase; Alk-P: Alkaline phosphatase;

γ-GT: γ-glutamyltransferase; INR: international normalized ratio; HBsAg: Hepatitis B Surface Antigen;

HBeAg: Hepatitis B e Antigen; HBV: Hepatitis B Virus; NA: data not available;

**eFigure 1. Study Flowchart for the Inclusion of Participants**

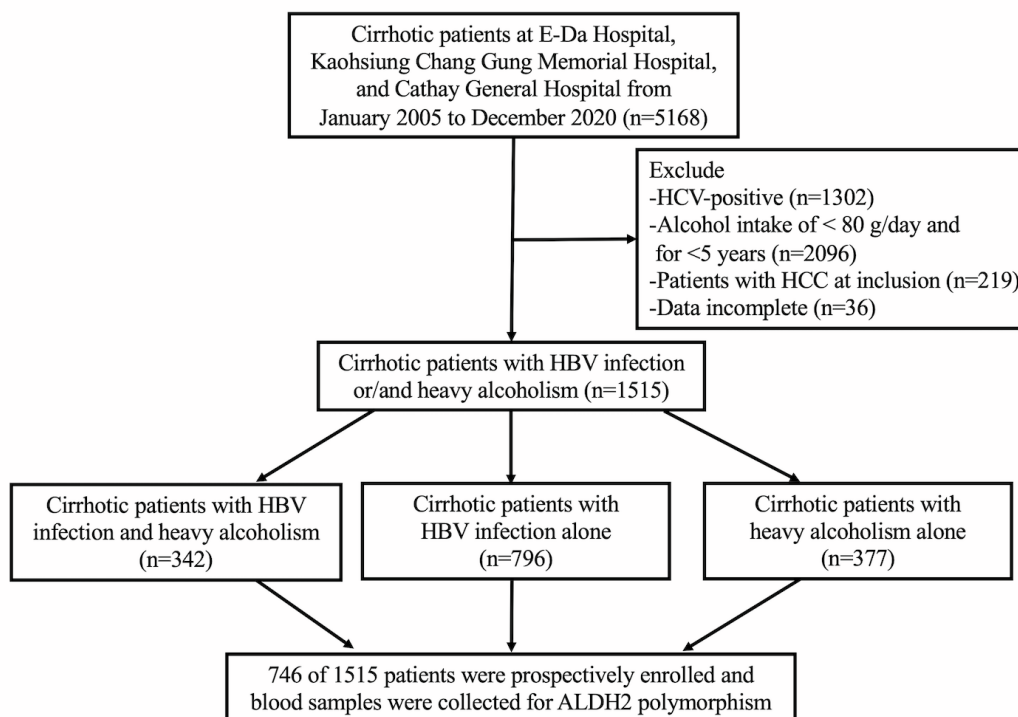

## eFigure 2. The Cumulative Incidences of HCC and Mortality After Propensity Score Matching

The cumulative incidences of HCC (A-B) and mortality (D-E) were higher in cirrhotic patients with concomitant HBV infection and alcoholism than in those with HBV infection alone or alcoholism alone. The cumulative incidences of HCC (C) and mortality (F) were not significant difference between patients with HBV infection alone and those with alcoholism alone.

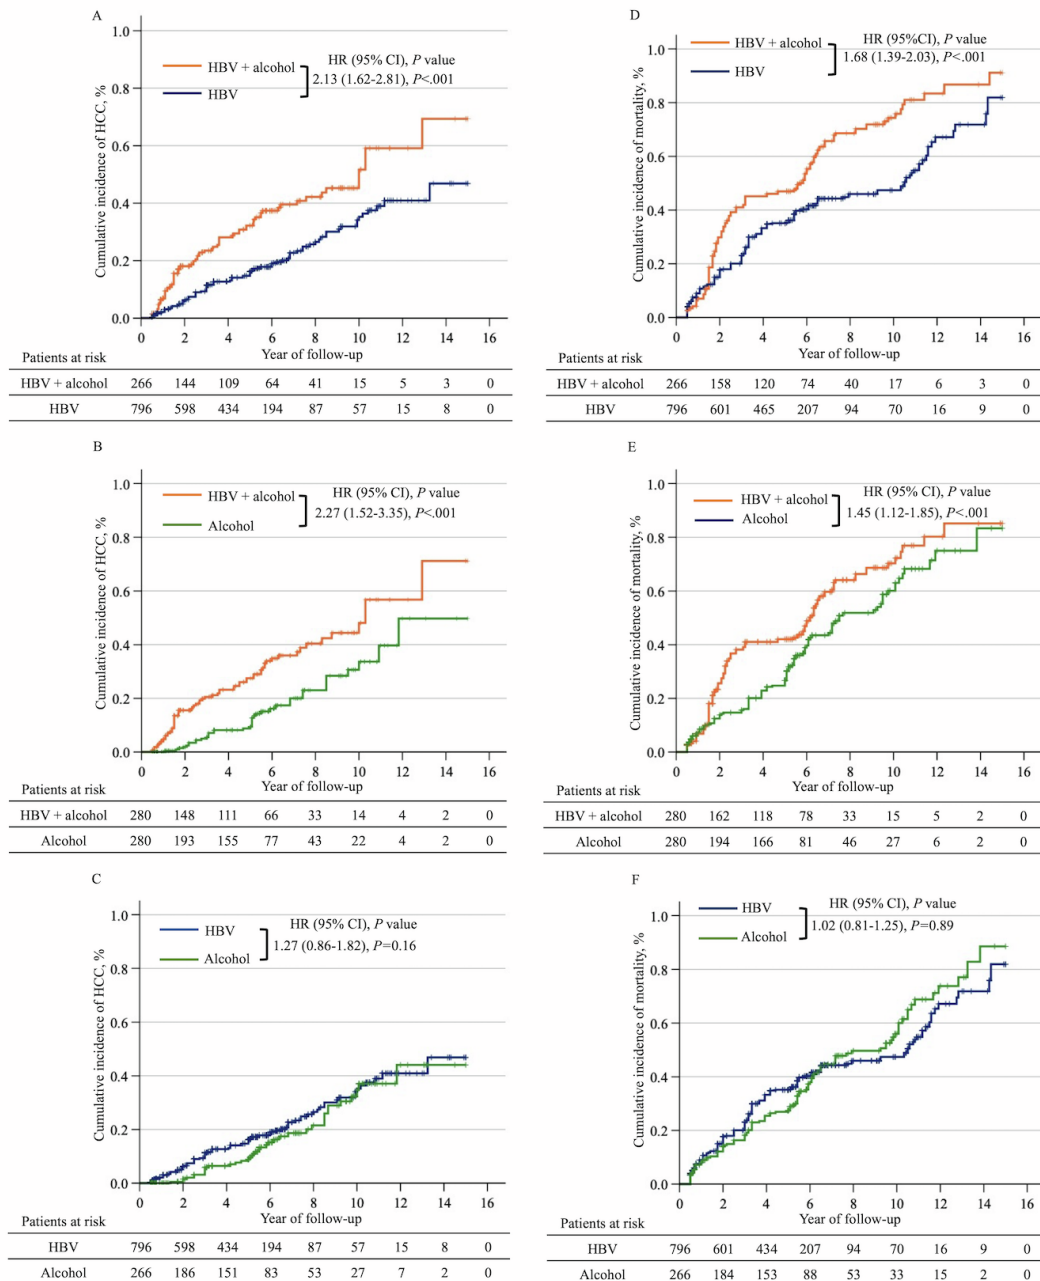



### eFigure 3. The Cumulative Incidences of HCC With Competing Risk Analysis

The cumulative incidences of HCC (A-B) were higher in cirrhotic patients with concomitant HBV infection and alcoholism than in those with HBV infection alone or alcoholism alone. The cumulative incidences of HCC (C) were not significant difference between patients with HBV infection alone and those with alcoholism alone.

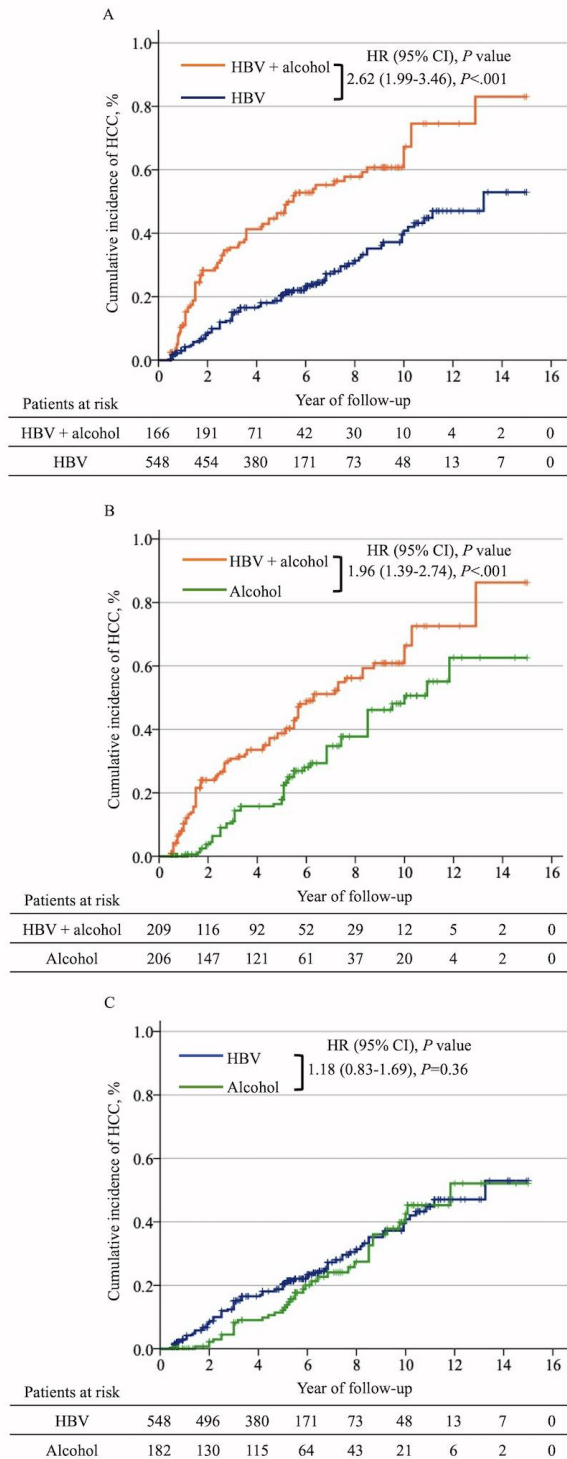

## eFigure 4. The Cumulative Incidences of HCC and Mortality in Compensated Cirrhotic Patients

The cumulative incidences of HCC (A) and mortality (B) were higher in compensated cirrhotic patients with concomitant HBV infection and alcoholism than in those with HBV infection alone or alcoholism alone.

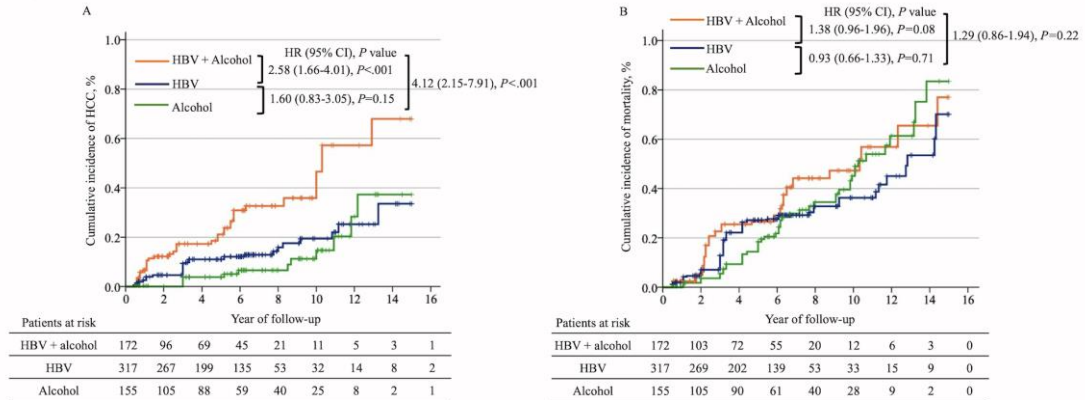

Supplement: jamanetwopen-e2223511-s001.pdf [file jamanetwopen-e2223511-s001.pdf]
